# Supplementary material
Source: PubMed Central journal article supplement (PMC3387699)
Supplement: supp_pp.112.197798_197798Supplementary_Tables_and_Figures_combined.pdf [file supp_pp.112.197798_197798Supplementary_Tables_and_Figures_combined.pdf]

**Supplemental Table S1.** Identity scores (%) among MT1 and MT2 protein subgroups in barley.

|       | MT1a | MT1b1 | MT1b2 | MT1b3 |
|-------|------|-------|-------|-------|
| MT1a  | 100  | 75.6  | 75.1  | 75.6  |
| MT1b1 | 75.6 | 100   | 91.1  | 91.1  |
| MT1b2 | 75.1 | 91.1  | 100   | 95.5  |
| MT1b3 | 75.6 | 91.1  | 95.5  | 100   |
|       | MT2a | MT2b1 | MT2b2 | MT2c  |
| MT2a  | 100  | 65.4  | 65.1  | 66.2  |
| MT2b1 | 65.4 | 100   | 94    | 79.6  |
| MT2b2 | 65.1 | 94    | 100   | 78.4  |
| MT2c  | 66.2 | 79.6  | 78.4  | 100   |

**Supplemental Table S2. Primers used in this study**

| Gene/cDNA               | Primer <sup>1</sup> | Sequence 5'-3'                    |
|-------------------------|---------------------|-----------------------------------|
| Cloning                 |                     |                                   |
| <i>MT1a</i>             | 1a                  | GGCTTAAU TTCGGGTT CACCAGATCT      |
|                         | 1b                  | GGTTTAAUCAGATCATCAGACGCTCG        |
| <i>MT1b1</i>            | 2a                  | GGCTTAAUGGCAACACAACAGAACCA        |
|                         | 2b                  | GGTTTAAUCACAAGCGCATCGACTGC        |
| <i>MT1b2/MT1b3</i>      | 3a                  | GGCTTAAUAGCAGCACAGGTTACAGC        |
|                         | 3b                  | GGTTTAAUCACCACAATCGCATAACACC      |
| <i>MT2a</i>             | 4a                  | GGCTTAAUATAACCAACTCGAGGGAG        |
|                         | 4b                  | GGTTTAAUCCGTCTCCATGTGTTGAT        |
| <i>MT2b1</i>            | 5a                  | GGCTTAAUCAGGAAGCTCCTAGCCAA        |
|                         | 5b                  | GGTTTAAUATGCACGCACGGTGCATG        |
| <i>MT2b2</i>            | 5a                  | as above                          |
|                         | 5d                  | GGTTTAAUATGCAGGCAGGTGCTTACA       |
| <i>MT2c</i>             | 6a                  | GGCTTAAUTCGCCACCGCCACCAAG         |
|                         | 6b                  | GGTTTAAUCGTGCTCGCTCTGCCGG         |
| <i>MT3</i>              | 7a                  | GGCTTAAUGAGGCACTTCTCCGATCA        |
|                         | 7b                  | GGTTTAAUGACACGGGTTACTAGTACGGG     |
| <i>MT4</i>              | 8a                  | GGCTTAAUACGCCTGAGAAGATCGAG        |
|                         | 8b                  | GGTTTAAUGGCTCAGCGGCACTTATT        |
| <i>CUP1</i>             | 9a                  | GGCTTAAUACTCCTTGTCTTGTATCA        |
|                         | 9b                  | GGTTTAAUTTATTCTTGGGGCGACAT        |
| Subcloning into p462    |                     |                                   |
| <i>MT1a</i>             | 10a                 | GCAGATCTATGTCTTGCAATTGTGGATC      |
|                         | 10b                 | CTCGAGTTAACAGTTACAGGGGTTG         |
| <i>MT1b1/MT1b2</i>      | 11a                 | AGATCTATGTCTTGACAGCTGTGGA         |
|                         | 11b                 | CTCGAGTTAGCAGTTACAAGGGTTG         |
| <i>MT1b3</i>            | 11c                 | AGATCTATGTCTTGACAGTTGTGGATC       |
|                         | 11b                 | as above                          |
| <i>MT2a</i>             | 12a                 | AGATCTATGTCTGCTGCGGAGGC           |
|                         | 12b                 | CTCGAGTCACTTGACAGGTGCACGG         |
| <i>MT2b1/MT2b2</i>      | 13a                 | CGGATCCATGTCTTGCTGCGGAGGA         |
|                         | 13b                 | CTCGAGCTAGCAACTGCAGCAGGAGC        |
| <i>MT2c</i>             | 14a                 | GGATCCATGTCTTGCTGCGGCGGC          |
|                         | 14b                 | GCTCGAGTCACTTGCAACTGCAGCAGG       |
| <i>MT3</i>              | 15a                 | AGATCTATGGCTGACAAGTGC GGCAAC      |
|                         | 15b                 | CTCGAGTCAGTGTCCGCAGGTGCA          |
| <i>MT4</i>              | 16a                 | CAGATCTATGGGCTGCGACGACAAGTGCG     |
|                         | 16b                 | CTCGAGTCAGGCGGTCGAGCCGCA          |
| <i>CUP1</i>             | 17a                 | CGGATCCATGTTACAGCAATTGATTAAC      |
|                         | 17b                 | CTCGAGTCATTTCCCAGAGCAGCA          |
| Subcloning into pMal-c2 |                     |                                   |
| <i>MT3</i>              | 15c                 | GAAGGATTTCAATGGCTGACAAGTGC GGCAAC |
|                         | 15b                 | as above                          |
| <i>MT4</i>              | 16c                 | GAAGGATTTCAATGGGCTGCGACGACAAGTGCG |
|                         | 16b                 | as above                          |
| RT-qPCR                 |                     |                                   |
| <i>MT3</i>              | 18a                 | GACAAG ACC CAG TGC GTG AA         |
|                         | 18b                 | GGTGTCAACCATGACGATGC              |
| <i>MT4</i>              | 19a                 | GCGTGTGTGAAAGTGTGTGTATA           |
|                         | 19b                 | CACTGATGCGAGTAGGTGGTAGG           |
| <i>GAPDH</i>            | 20a                 | GCTCAAGGGTATCATGGGTTACG           |
|                         | 20b                 | GCAATTCAGCCTTAGCATCAAAG           |
| <i>LTP2</i>             | 21a                 | ACCCAACTACGGGCACT                 |
|                         | 21b                 | AGTGCGGTACGGGTATGC                |
| <i>ITR1</i>             | 22a                 | CAGTTTCGGGGATTTCGTG               |
|                         | 22b                 | GACTGACCACGTAGGTGCG               |
| <i>HOR2</i>             | 23a                 | CCCAAC AGT CGG TCC AAG            |
|                         | 23b                 | CGACTTGCTCCTCCTGCA                |

<sup>1</sup>All a and c primers are forward orientated whereas b and d represent reverse primers. Modifications with 2'-deoxyuridine are indicated with a U.

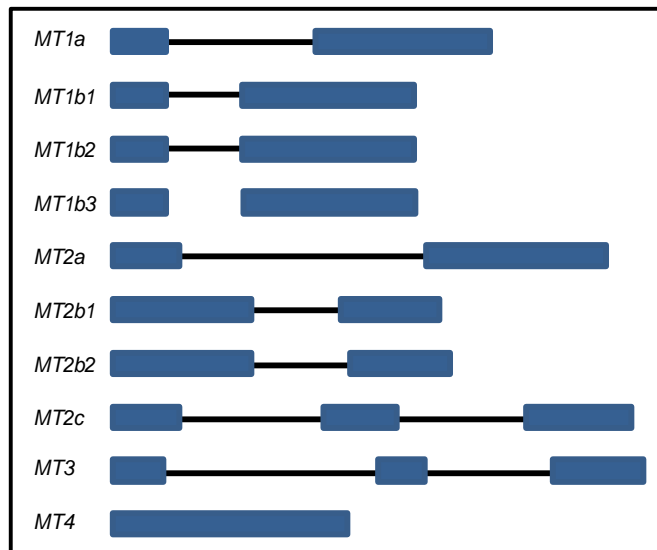

**Supplemental Figure S1.** Exon-intron gene organization of barley MT genes. Exons and introns are indicated with blue boxes and lines, respectively. *MT2b1* and *MT2b2* introns are not identical but share intron positions. Genomic DNA encoding *MT1b3* was not detected.



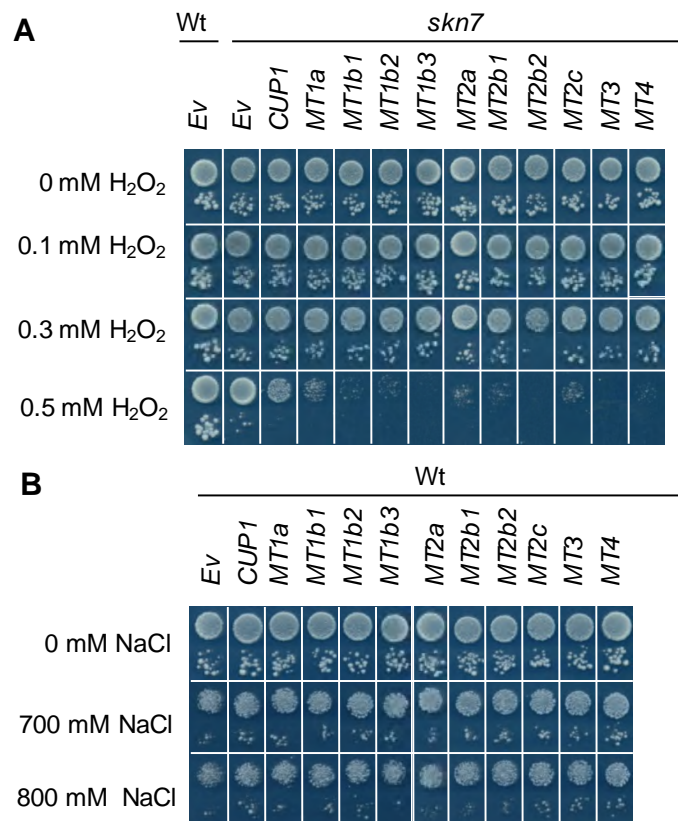

**Supplemental Figure S3.** Effects of barley MT expression on H<sub>2</sub>O<sub>2</sub> tolerance in *skn7* and salt tolerance in wild type yeast. Expression of *MT1a*, *MT1b1*, *MT1b2*, *MT1b3*, *MT2a*, *MT2b1*, *MT2b2*, *MT2c*, *MT3* and *MT4* in *skn7* (A) and in wild type (B). In both (A) and (B) cells were spotted in two concentrations (OD<sub>600</sub> = 0.05 and OD<sub>600</sub> = 0.0005). *skn7* or wild type were transformed with vector p426 or CUP1 as negative and positive controls, respectively.

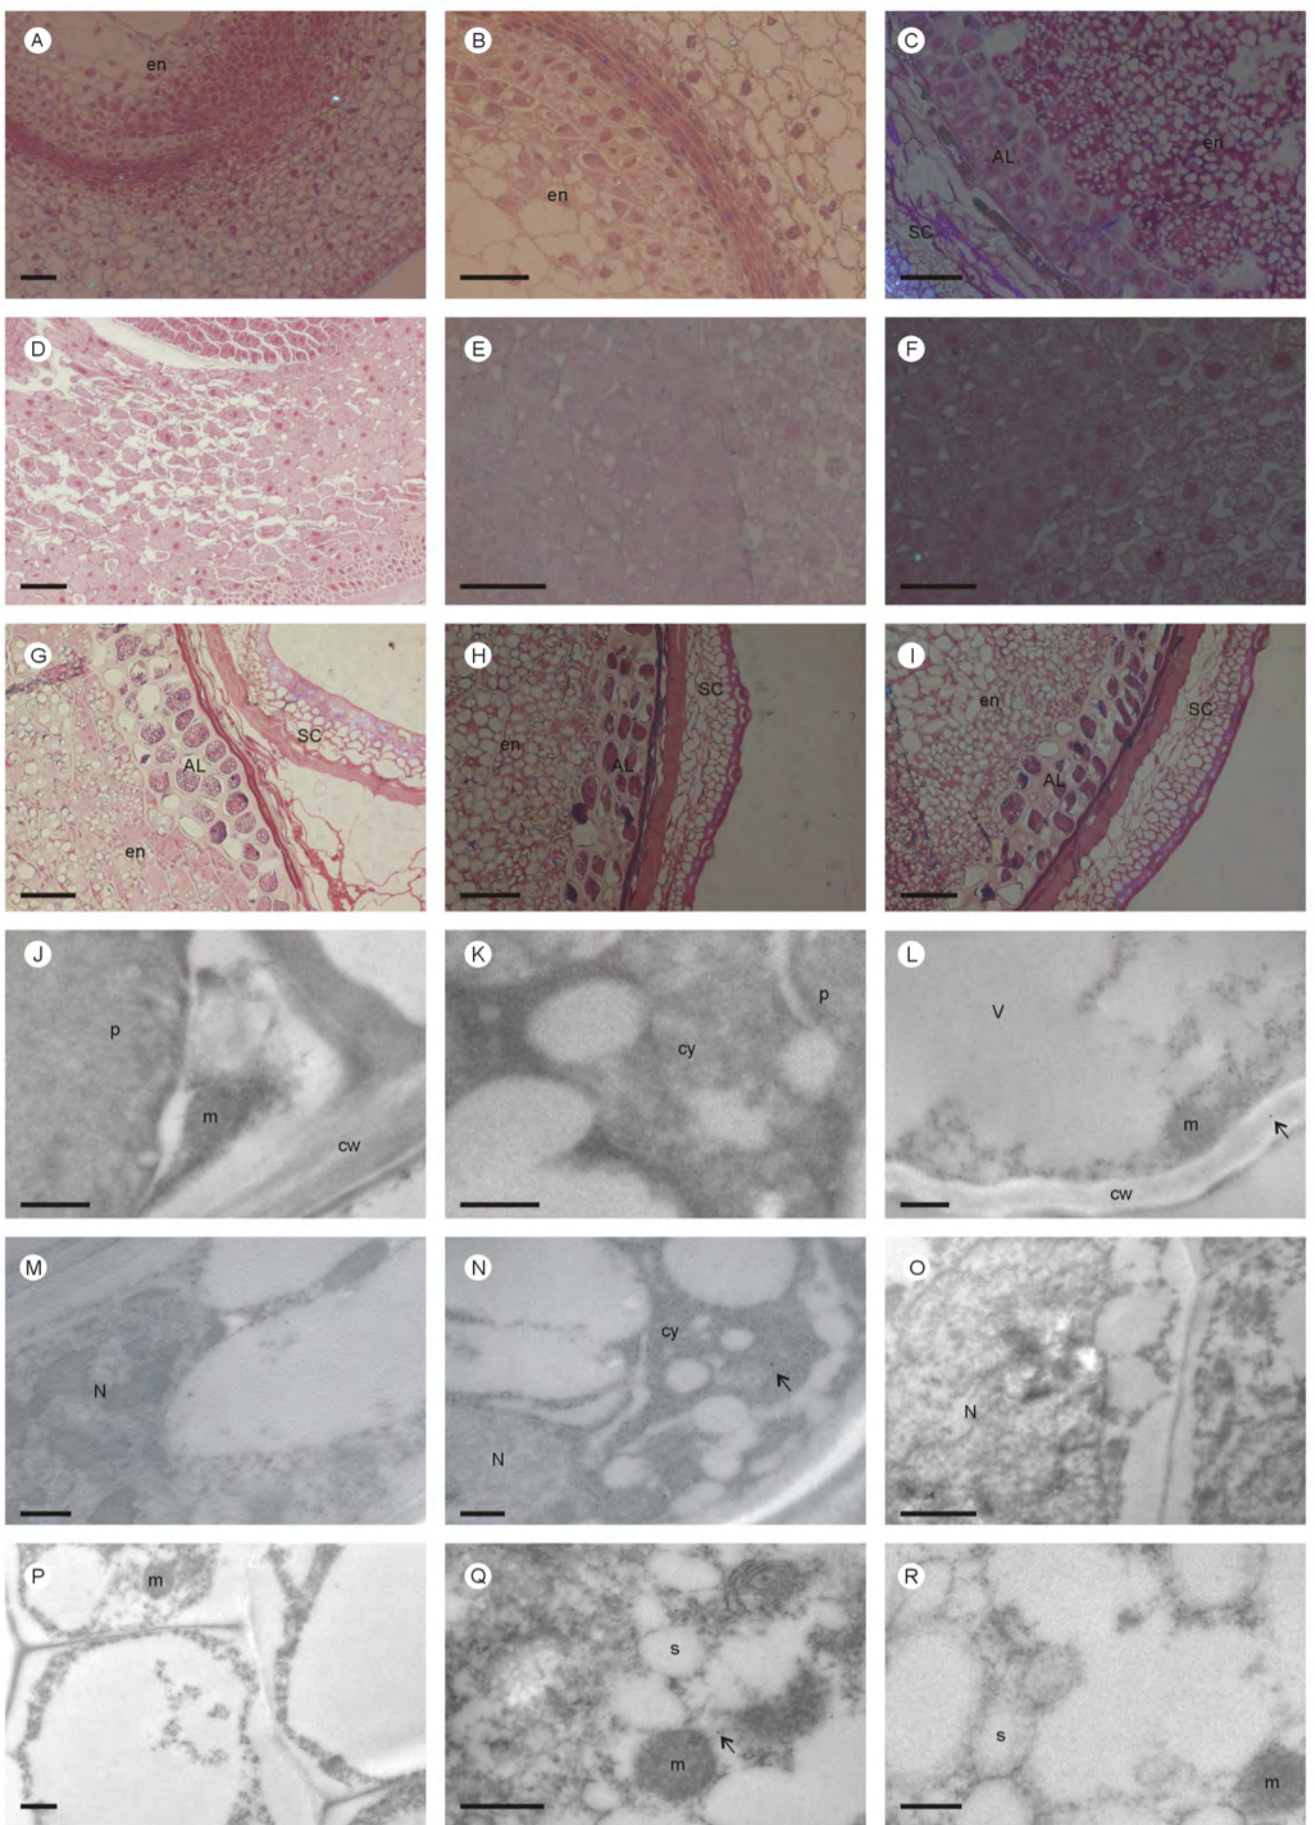

**Supplemental Figure S4.** (A-I) Controls of developing grain transversal sections stained by fuchsin and examined under bright field epipolarized light (A) Control section of a 7 dap grain lacking the incubation with the anti-MT antibody. (B) Control sections of 7 dap grain (B) and 14 dap grain (C) treated with MT4 pre-immune serum. Control sections of 21 dap embryo lacking the incubation with the anti-MT antibody (D), treated with MT3 (E) or MT4 (F) pre-immune serum. Control sections of mature grain lacking the incubation with the anti-MT antibody (G), treated with MT3 (H) or MT4 (I) pre-immune serum. (J-R) Control sections of developing grain transversal sections observed with a transmission electron microscope. View of pericarp cells (J, K) and of endosperm cells (L) of a 7 dap grain sections lacking the incubation with the anti-MT antibody (J) or treated with MT4 (K, L) pre-immune serum. View of embryo cells of a 14 dap grain (M-N) and of a 21 dap grain (O) sections lacking the incubation with the anti-MT antibody (M) or treated with MT3 (N, O). View of embryo cells (P) and of the aleurone layer (Q-R) of 21 dap grain section treated with MT3 pre-immune serum (P, Q) or lacking the incubation with the anti-MT antibody (R). Arrows indicate the weak presence of gold particles. Abbreviations; AL, aleurone cell layer; cw, cell wall; cy, cytosol; en, endosperm; m, mitochondria; N, nucleus; p, plastid; s, spherosome; SC, seed coat. v, vacuole. Bars = 100  $\mu\text{m}$  (A-I) and = 0.5  $\mu\text{m}$  (J-R).
